# Supplementary material for: R-Spondin2, a Positive Canonical WNT Signaling Regulator, Controls the Expansion and Differentiation of Distal Lung Epithelial Stem/Progenitor Cells in Mice
Source: MDPI journal article supplement (doi:10.3390/ijms23063089), 2022-03-13
Supplement: s1 [file s1]

**Supplementary Table S2. DNA sequences of oligonucleotide primers**

| Gene                 | Direction | Sequence (5'-3')                  | Application |
|----------------------|-----------|-----------------------------------|-------------|
| <b><i>Abca3</i></b>  | Forward   | AGC AGG ACC GGG AGT CTA AG        | qRT-PCR     |
|                      | Reverse   | ACA GTG GAG GGA TAG TGA GCA       |             |
| <b><i>Actb</i></b>   | Forward   | ATG GAG GGG AAT ACA GCC C         | qRT-PCR     |
|                      | Reverse   | TTC TTT GCA GCT CCT TCG TT        |             |
| <b><i>Aqp5</i></b>   | Forward   | ATT GGC TTG TCG GTC ACA CT        | qRT-PCR     |
|                      | Reverse   | ACG ATC GGT CCT ACC CAG AA        |             |
| <b><i>Axin2</i></b>  | Forward   | TGA CTC TCC TTC CAG ATC CCA       | qRT-PCR     |
|                      | Reverse   | TGC CCA CAC TAG GCT GAC A         |             |
| <b><i>Bmpr1a</i></b> | Forward   | AAC AGC GAT GAA TGT CTT CGA G     | qRT-PCR     |
|                      | Reverse   | GTC TGG AGG CTG GAT TAT GGG       |             |
| <b><i>Bpifa1</i></b> | Forward   | TGC CTT TGG CTG TAA GCC C         | qRT-PCR     |
|                      | Reverse   | AGA ATT GCC TCC TCC AGA CTT TA    |             |
| <b><i>Cyp2f2</i></b> | Forward   | GGA CCC AAA CCT CTC CCA ATC       | qRT-PCR     |
|                      | Reverse   | CCG TGA ACA CCG ACC CAT AC        |             |
| <b><i>Epcam</i></b>  | Forward   | GCG GCT CAG AGA GAC TGT G         | qRT-PCR     |
|                      | Reverse   | CCA AGC ATT TAG ACG CCA GTT T     |             |
| <b><i>Foxj1</i></b>  | Forward   | ACC AAG ATC ACT CTG TCG GC        | qRT-PCR     |
|                      | Reverse   | TCT CCC GAG GCA CTT TGA TG        |             |
| <b><i>Gapdh</i></b>  | Forward   | AGA AGA CTG TGG ATG GCC CCT C     | qRT-PCR     |
|                      | Reverse   | GAT GAC CTT GCC CAC AGC CTT       |             |
| <b><i>Id1</i></b>    | Forward   | CCT AGC TGT TCG CTG AAG GC        | qRT-PCR     |
|                      | Reverse   | CTC CGA CAG ACC AAG TAC CAC       |             |
| <b><i>Krt5</i></b>   | Forward   | TCT GCC ATC ACC CCA TCT GT        | qRT-PCR     |
|                      | Reverse   | CCT CCG CCA GAA CTG TAG GA        |             |
| <b><i>Lgr5</i></b>   | Forward   | AGC CTT CAA TCC CTG CGC CTA G     | qRT-PCR     |
|                      | Reverse   | GAC AGG GAC GTC TGT GAG AGC ATT G |             |
| <b><i>Muc5ac</i></b> | Forward   | GTG GTT TGA CAC TGA CTT CCC       | qRT-PCR     |
|                      | Reverse   | CTC CTC TCG GTG ACA GAG TCT       |             |
| <b><i>Pdgfra</i></b> | Forward   | TCC ATG CTA GAC TCA GAA GTC A     | qRT-PCR     |
|                      | Reverse   | TCC CGG TGG ACA CAA TTT TTC       |             |

|                        |         |                                 |                    |
|------------------------|---------|---------------------------------|--------------------|
| <b><i>pdgfrb</i></b>   | Forward | TTC CAG GAG TGA TAC CAG CTT     | qRT-PCR            |
|                        | Reverse | AGG GGG CGT GAT GAC TAG G       |                    |
| <b><i>Pdpr</i></b>     | Forward | GGG ATG AAA CGC AGA CAA CAG     | qRT-PCR            |
|                        | Reverse | TTA GGG CGA GAA CCT TCC AG      |                    |
| <b><i>Rspo2</i></b>    | Forward | ATG TGC ACG ATG CAG AAT AGA     | qRT-PCR            |
|                        | Reverse | ACC AAC TTC ACA ACC TTC TAC     |                    |
| <b><i>Rtkn2</i></b>    | Forward | GTC TGT TCA CGG AGA TGA GG      | qRT-PCR            |
|                        | Reverse | AGC CAA CCA GAC CTT TTC C       |                    |
| <b><i>Scgb1a1</i></b>  | Forward | ATG AAG ATC GCC ATC ACA ATC AC  | qRT-PCR            |
|                        | Reverse | GGA TGC CAC ATA ACC AGA CTC T   |                    |
| <b><i>Sftpa</i></b>    | Forward | GAG GAG CTT CAG ACT GCA CTC     | qRT-PCR            |
|                        | Reverse | AGA CTT TAT CCC CCA CTG ACA G   |                    |
| <b><i>Sftpc</i></b>    | Forward | GAG GTC CTG ATG GAG AGT CC      | qRT-PCR            |
|                        | Reverse | CCA CGA TGA GAA GGC GTT TG      |                    |
| <b><i>Smad6</i></b>    | Forward | GCA ACC CCT ACC ACT TCA GC      | qRT-PCR            |
|                        | Reverse | GTG GCT TGT ACT GGT CAG GAG     |                    |
| <b><i>Tubb4a</i></b>   | Forward | CAC CTG CAA GCC GGT CAA T       | qRT-PCR            |
|                        | Reverse | TCC CCA TGA TAG GTC CCA GTG     |                    |
| <b><i>Vimentin</i></b> | Forward | CGG CTG CGA GAG AAA TTG C       | qRT-PCR            |
|                        | Reverse | CCA CTT TCC GTT CAA GGT CAA G   |                    |
| <b>JK1552</b>          | Forward | GTA GGC GAT CTA CAC CTG GTG CTG | Genomic<br>DNA PCR |
| <b>JK1553</b>          | Reverse | CAA CCT CTG CGG AGC ACT GCC TTC |                    |
