# Supplementary material for: R-Spondin2, a Positive Canonical WNT Signaling Regulator, Controls the Expansion and Differentiation of Distal Lung Epithelial Stem/Progenitor Cells in Mice
Source: MDPI journal article supplement (doi:10.3390/ijms23063089), 2022-03-13
Supplement: s1 [file s1]

**Supplementary Table S1. List of antibodies used for immunofluorescence staining.**

| Primary antibodies                                                          | Types             | Dilution | Supplier                  | Catalog #   |
|-----------------------------------------------------------------------------|-------------------|----------|---------------------------|-------------|
| Mouse anti-Ac- $\alpha$ -tubulin                                            | Monoclonal, IgG2b | 1:500    | Sigma-Aldrich             | T6793       |
| Mouse anti-FOXJ1                                                            | Monoclonal, IgG1  | 1:250    | Thermo Fisher Scientific  | 14-9965-82  |
| Mouse anti-HOPX                                                             | Monoclonal, IgG1  | 1:200    | Santa Cruz                | SC-398703   |
| Rabbit anti-Ki-67                                                           | Rabbit, IgG       | 1:200    | Cell signaling technology | 9129        |
| Rabbit anti-KRT5                                                            | Polyclonal, IgG   | 1:500    | BioLegend                 | 905504      |
| Rabbit anti-MUC5AC                                                          | Monoclonal, IgG1  | 1:200    | Thermo Fisher Scientific  | MA5-12178   |
| Syrian hamster anti-PDPN                                                    | Monoclonal, IgG   | 1:250    | Thermo Fisher Scientific  | 14-5381-82  |
| Mouse anti-RSPO2                                                            | Monoclonal, IgG1  | 1:1500   | Yoon Lab                  |             |
| Rabbit anti-non-phosphorylated- $\beta$ -catenin (Active- $\beta$ -catenin) | Rabbit, IgG       | 1:1000   | Cell signaling technology | 8814        |
| Rabbit anti-RSPO2                                                           | Rabbit, IgG       | 1:500    | Proteintech               | 17781-1-AP  |
| Rabbit anti-SCGB1A1                                                         | Rabbit, IgG       | 1:500    | Abcam                     | ab40873     |
| Rabbit anti-SFTPC                                                           | Rabbit, IgG       | 1:500    | EMD Millipore             | ABC99       |
| Mouse anti- $\beta$ -galactosidase                                          | Monoclonal, IgG1  | 1:500    | Sigma-Aldrich             | G8021       |
| Mouse anti- $\beta$ -galactosidase                                          | Monoclonal, IgM   | 1:500    | Sigma-Aldrich             | G6282       |
| Secondary antibodies                                                        |                   | Dilution | Supplier                  | Catalog #   |
| Alexa Fluor 488 F(ab') <sub>2</sub> fragment donkey anti-mouse IgG (H+L)    |                   | 1:750    | Jackson ImmunoResearch    | 715-546-150 |
| Alexa Fluor 488 goat anti-syrian hamster IgG (H+L)                          |                   | 1:750    | Jackson ImmunoResearch    | 107-545-142 |
| Cy3 donkey anti-mouse IgG (H+L)                                             |                   | 1:750    | Jackson ImmunoResearch    | 715-165-150 |
| Cy3 F(ab') <sub>2</sub> fragment donkey anti-rabbit IgG (H+L)               |                   | 1:750    | Jackson ImmunoResearch    | 711-166-152 |
| Cy3 goat anti-rabbit IgG (H+L)                                              |                   | 1:750    | Jackson ImmunoResearch    | 111-165-003 |
| FITC donkey F(ab') <sub>2</sub> fragment anti-mouse IgM                     |                   | 1:750    | Jackson ImmunoResearch    | 715-096-020 |
| FITC goat anti-mouse IgG (H+L)                                              |                   | 1:750    | Jackson ImmunoResearch    | 115-095-166 |
