# Supplementary material for: R-Spondin2, a Positive Canonical WNT Signaling Regulator, Controls the Expansion and Differentiation of Distal Lung Epithelial Stem/Progenitor Cells in Mice
Source: MDPI journal article supplement (doi:10.3390/ijms23063089), 2022-03-13
Supplement: s1 [file s1]

## Supplement Figures

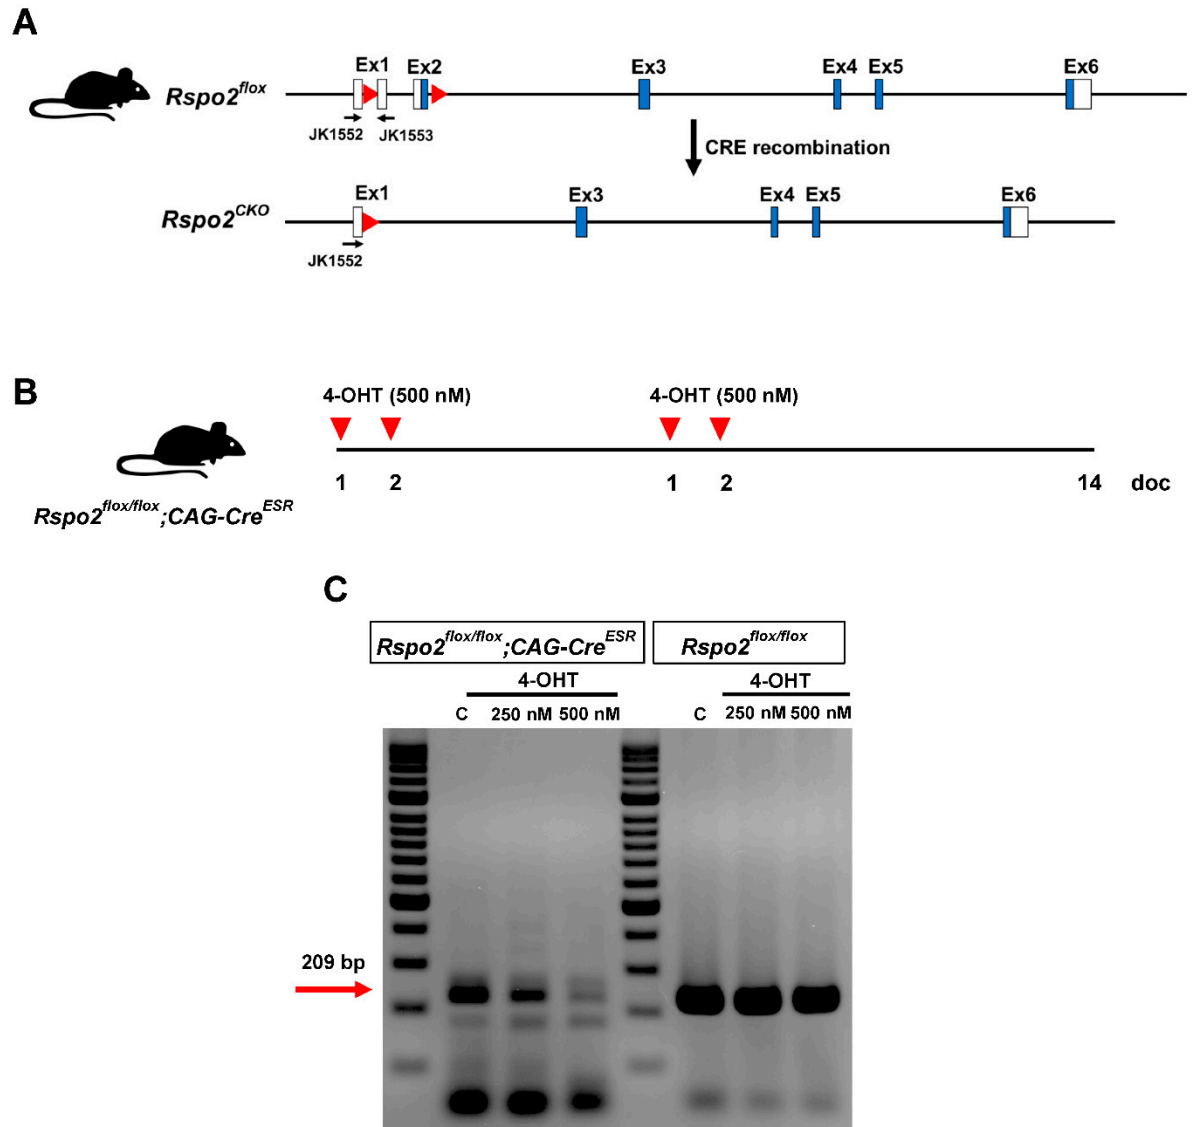

**Figure S1.** (A) Schematic structure of conditional *Rspo2* knockout allele before (*Rspo2<sup>flox</sup>*) and after (*Rspo2<sup>CKO</sup>*) 4-OHT-induced CRE recombination. (B) Schematic experimental schedule for conditional *Rspo2* knockout. (C) PCR using genomic DNA to confirm CRE recombination efficacy on the *Rspo2<sup>flox</sup>* allele after 4-OHT treatment.

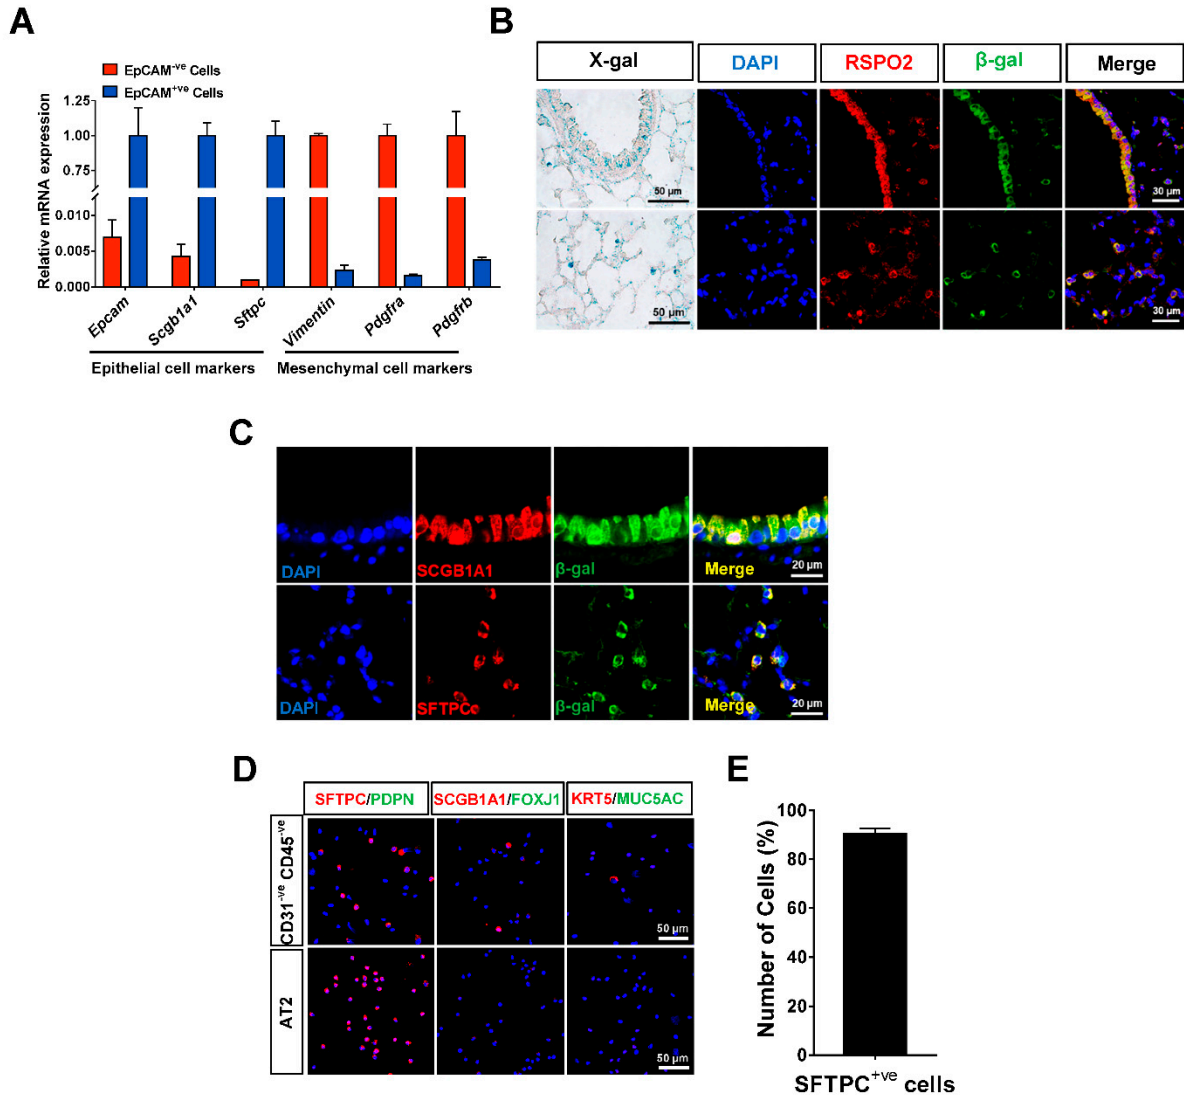

**Figure S2.** (A) qRT-PCR analysis of the expression of epithelial and mesenchymal cell marker genes in isolated DLESPs. (B) X-gal histochemical staining and immunofluorescence staining of RSPO2 and  $\beta$ -galactosidase ( $\beta$ -Gal) in the lungs of *Rspo2*<sup>LacZ/+</sup> mice. (C) Immunofluorescence staining of  $\beta$ -Gal and club cell marker, SCGB1A1, or AT2 cell marker, SFTPC, in *Rspo2*<sup>LacZ/+</sup> mouse lung tissues. (D) Immunofluorescence staining of different epithelial cell markers in isolated CD31<sup>-ve</sup> CD45<sup>-ve</sup> whole lung cells and AT2 cells. (E) Quantification of SFTPC<sup>+</sup> cells among the isolated AT2 cells. Data are presented as mean  $\pm$  SEM.

**A**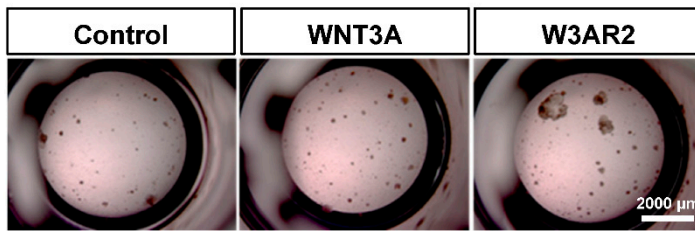**B**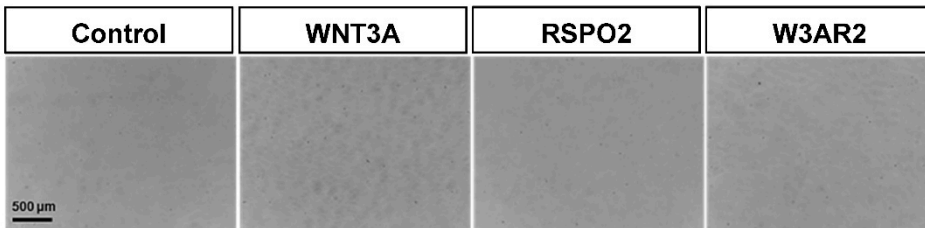

**Figure S3.** (A) Bright-field images of DLESP-derived organoid cultures treated with WNT3A (20 ng/ml) or W3AR2 (WNT3A, 20 ng/ml + RSPO2, 200 ng/ml). (B) Bright-field images of DLESP-derived organoids treated with WNT3A (20 ng/ml), RSPO2 (200 ng/ml), and both (W3AR2) in fibroblast-free organoid cultures.

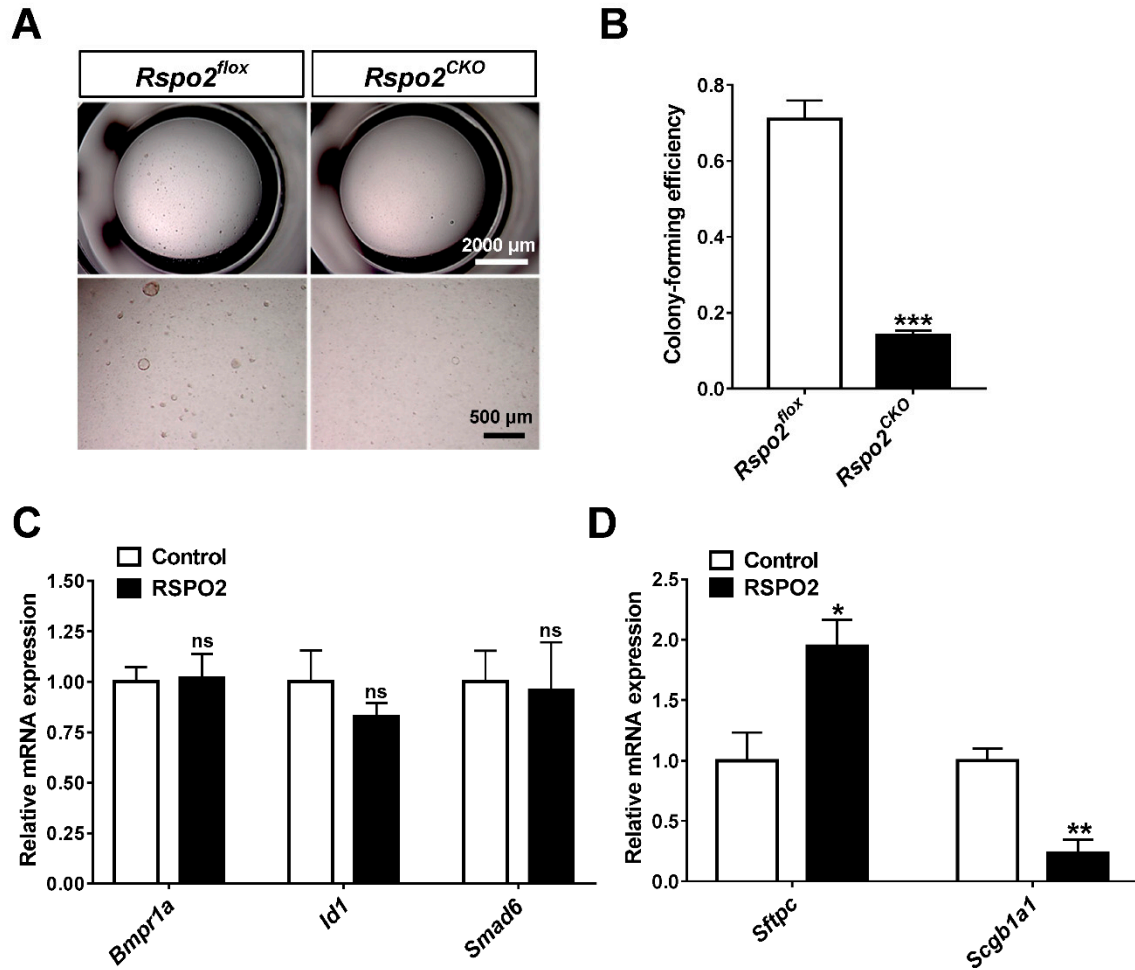

**Figure S4.** (A and B) Colony formation of *Rspo2<sup>CKO</sup>* and control *Rspo2<sup>flox</sup>* club cells in fibroblast-free, FGF10/HGF supplemented 3D organoid cultures. (C) qRT-PCR analysis of *Sftpc* and *Scgb1a1* in DLESP organoids treated with RSPO2 (200 ng/ml). (D) qRT-PCR analysis of BMP downstream target genes, *Bmpr1a*, *Id1*, and *Smad6*, in club cell-derived organoids. All organoids were harvested at day14 of culture for further analysis. Data are presented as mean  $\pm$  SEM. ns: no statistical significance, \* $p < 0.05$ , \*\* $p < 0.01$ , \*\*\* $p < 0.001$ .

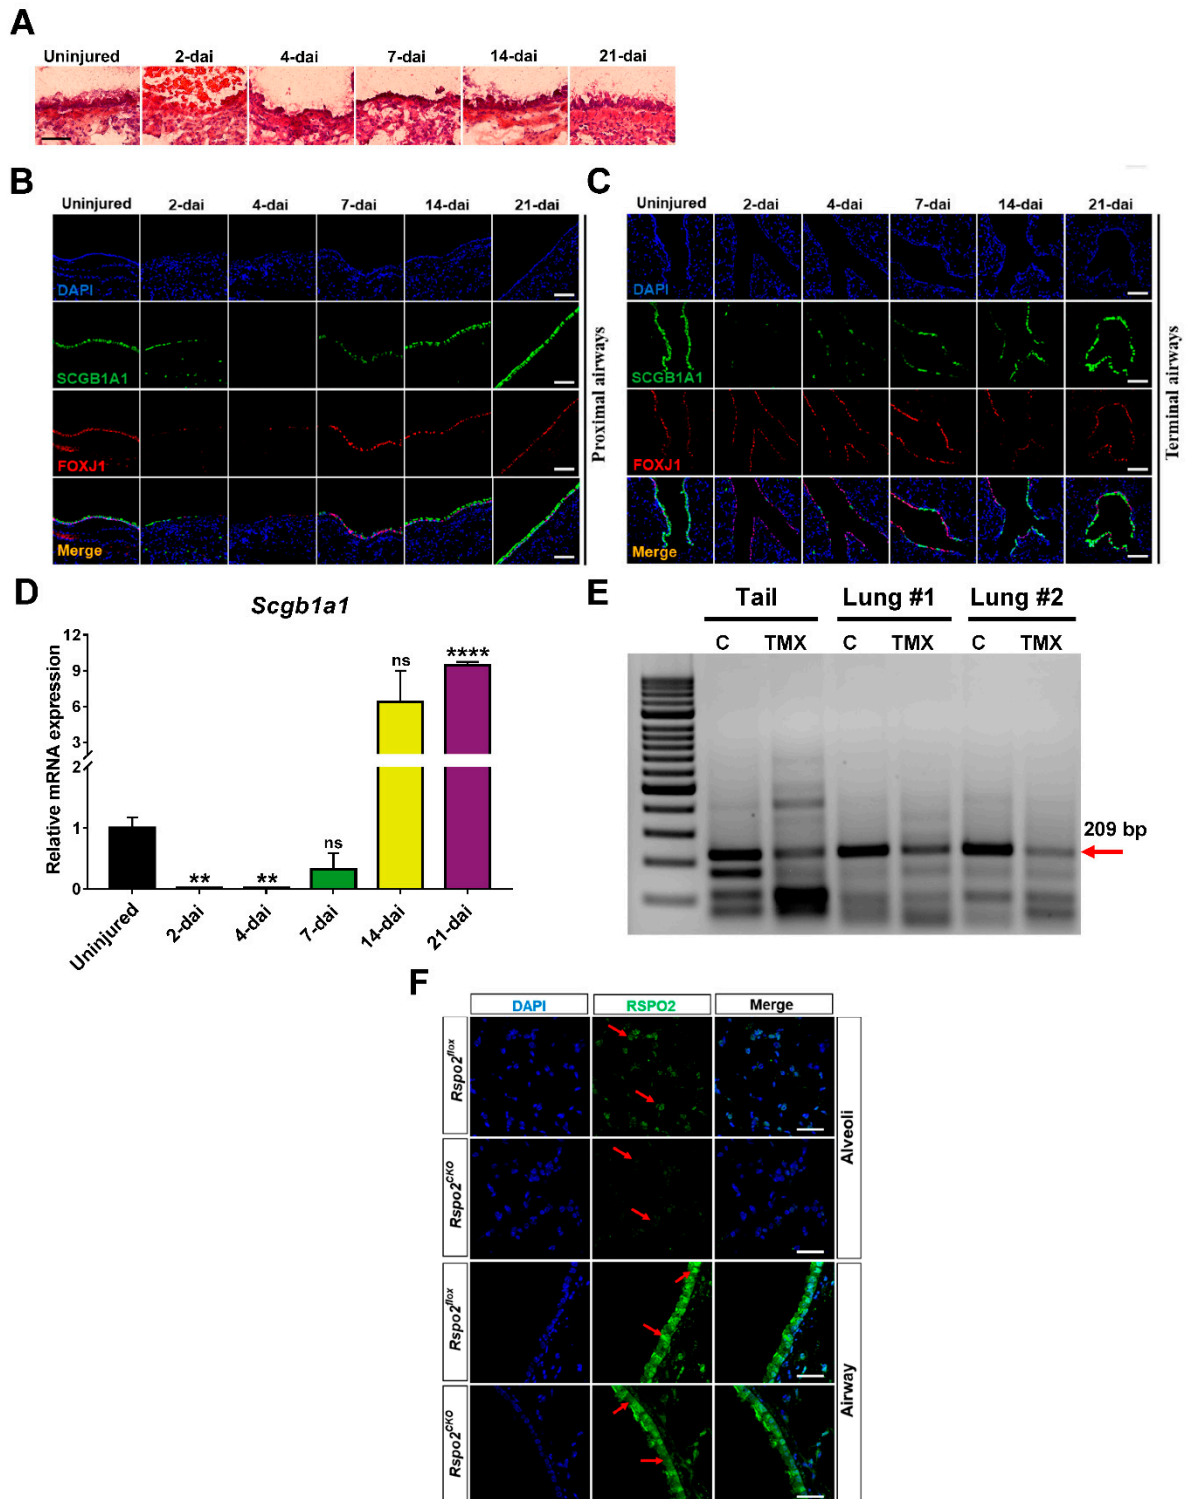

**Figure S5.** (A) Hematoxylin and eosin staining of regenerating distal airway tissues after naphthalene-induced acute lung injury. Dai, days after injury; scale bar, 100  $\mu$ m. (B and C) Immunofluorescence staining of SCGB1A1 and FOXJ1 in club and ciliated cells during airway regeneration. Scale bar, 100  $\mu$ m. (D) qRT-PCR analysis

of *Scgb1a1* expression during regeneration. (E) PCR using genomic DNA to confirm the efficiency of conditional *Rspo2* knockout after tamoxifen (TMX) or corn oil (C) injection in mice. (F) Immunofluorescence staining of RSPO2 in *Rspo2*<sup>CKO</sup> and control *Rspo2*<sup>fl<sup>ox</sup></sup> lung tissues. Scale bar, 30  $\mu$ m. Data are presented as mean  $\pm$  SEM. ns: no statistical significance, \*\*p < 0.01, \*\*\*\*p < 0.0001.
